# Supplementary material for: no child left behind encodes a novel chromatin factor required for germline stem cell maintenance in males but not females
Source: Oxford University Press journal article supplement (doi:10.1242/dev.067942), 2011-07-14
Supplement: dev067942tables1.pdf [file dev067942tables1.pdf]

**Table S1. Rescue of viability and fertility through tissue-specific expression of *nclb***

| Genotype                                             | Percentage viability<br>(normalized to 100%) | Males fertile | Females fertile |
|------------------------------------------------------|----------------------------------------------|---------------|-----------------|
| <i>nclb1/nclb2</i> ; nanos-GAL4/UAS-CG6751           | 41.5%                                        | yes           | no              |
| Control                                              | 9%                                           | no            | no              |
| <i>nclb1/nclb2</i> ; nanos-GAL4or UAS-CG6751/ TM6B   |                                              |               |                 |
| <i>nclb1/nclb2</i> ; tubulin-GAL4/UAS-CG6751         | 91%                                          | yes           | yes             |
| Control                                              | 27%                                          | no            | no              |
| <i>nclb1/nclb2</i> ; tubulin-GAL4or UAS-CG6751/ TM6B |                                              |               |                 |
| <i>nclb1/nclb2</i> ; da-GAL4/UAS-CG6751              | 73%                                          | yes           | yes             |
| Control                                              | 33%                                          | no            | no              |
| <i>nclb1/nclb2</i> ; da-GAL4 or UAS-CG6751/ TM6B     |                                              |               |                 |
| <i>nclb2/nclb2</i> ; tubulin-GAL4/UAS-CG6751         | 21%                                          | no            | no              |
| Control                                              | 0%                                           | N/A           | N/A             |
| <i>nclb2/nclb2</i> ; tubulin-GAL4or UAS-CG6751/ TM6B |                                              |               |                 |
