# Supplementary figures and images for: no child left behind encodes a novel chromatin factor required for germline stem cell maintenance in males but not females
Source: Oxford University Press journal article supplement (doi:10.1242/dev.067942), 2011-07-14

A

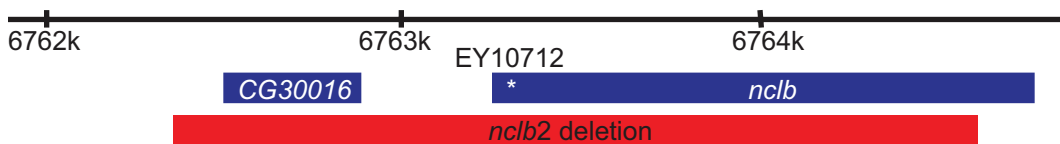

B

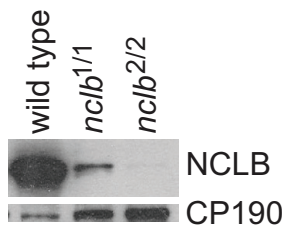

C

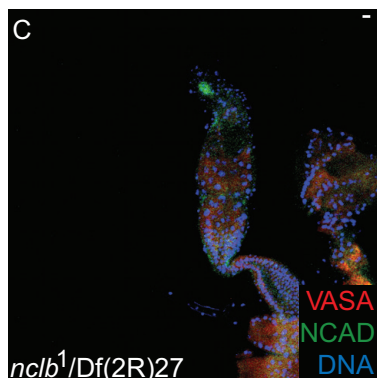

D

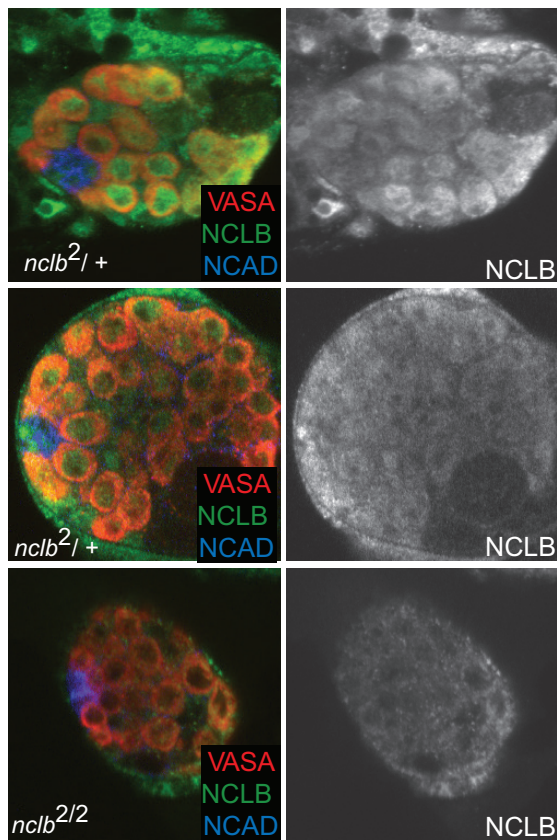

Supplement: dev067942figs1.pdf [file dev067942figs1.pdf]

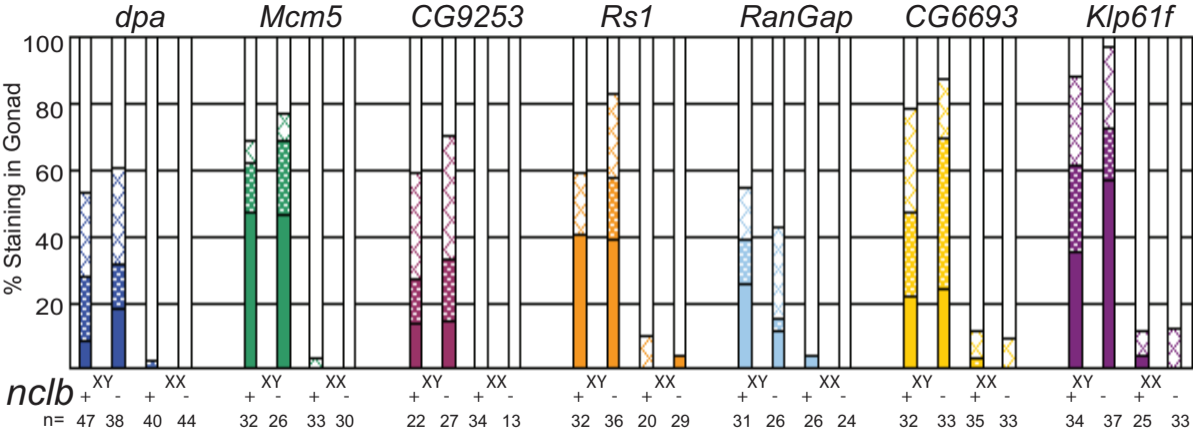

Supplement: dev067942figs2.pdf [file dev067942figs2.pdf]
